# Supplementary material for: Cooperative crosslinking in polyvinyl alcohol organogels
Source: Royal Society of Chemistry journal article supplement (doi:10.1039/d3sm00695f), 2023-01-01
Supplement: d3sm00695f1.pdf [file d3sm00695f1.pdf]

**Supporting Information for:  
Cooperative crosslinking in polyvinyl alcohol organogels**

Holli R. Scott, Ani N. Davis, Gretchen Marie Peters\*

Department of Chemistry and Biochemistry, James Madison University, Harrisonburg, VA, 22807

\*peter3gm@jmu.edu

**Table of Contents**

|                                                                                                  |     |
|--------------------------------------------------------------------------------------------------|-----|
| <b>Figure S1.</b> Critical Gelation Concentration and Kinematic Viscosity of <b>PVA-BA</b> Gel   | S2  |
| <b>Figure S2.</b> <b>PVA</b> and <b>BA</b> in Various Organic Solvents                           | S3  |
| <b>Figure S3.</b> Strain Sweeps of <b>PVA-BA</b> Gels with varying % <b>1,4-BDBA</b>             | S4  |
| <b>Figure S4.</b> Frequency Sweeps of <b>PVA-BA</b> Gels with varying % <b>1,4-BDBA</b>          | S5  |
| <b>Figure S5.</b> %T of <b>PVA-BA</b> Gels as a Function of [ <b>1,4-BDBA</b> ]                  | S6  |
| <b>Figure S6.</b> Critical Gelation Concentration <b>50:50 BA:1,4-BDBA</b> Gel                   | S7  |
| <b>Figure S7.</b> Critical Gelation Concentration of <b>PVA-1,4-BDBA</b> Gel                     | S7  |
| <b>Figure S8.</b> Hysteresis Loops of 100% <b>BA</b> and <b>50:50 BA:1,4-BDBA</b> Gels           | S8  |
| <b>Figure S9.</b> Self-healing Images of <b>50:50 BA:1,4-BDBA</b> Gels                           | S8  |
| <b>Figure S10.</b> Strain Sweeps of <b>PVA-BA</b> and <b>PVA-1,4-BDBA</b> Gels at 25 mM          | S9  |
| <b>Figure S11.</b> Frequency Sweeps of <b>PVA-BA</b> and <b>PVA-1,4-BDBA</b> Gels at 25 mM       | S9  |
| <b>Figure S12.</b> Full FTIR Spectra of Lyophilized <b>PVA-BA</b> Gels                           | S10 |
| <b>Figure S13.</b> B-O Stretching Region of FTIR Spectra of Lyophilized <b>PVA-BA</b> Gels       | S10 |
| <b>Figure S14.</b> Stacked NMR <b>BA</b> peaks for all <b>BA</b> standards and Curve of Best Fit | S11 |

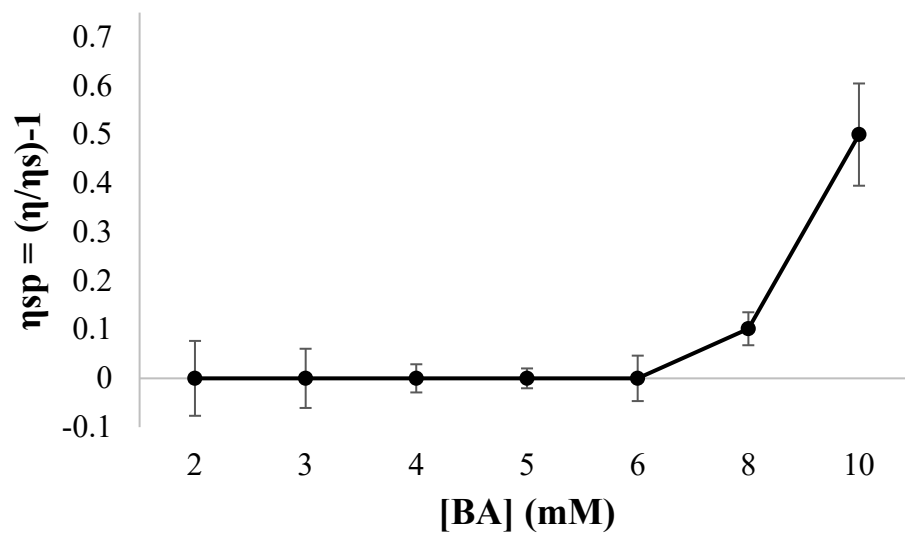

**Figure S1.** Change in kinematic viscosity of 0.5% PVA in DMSO as a function of [BA].

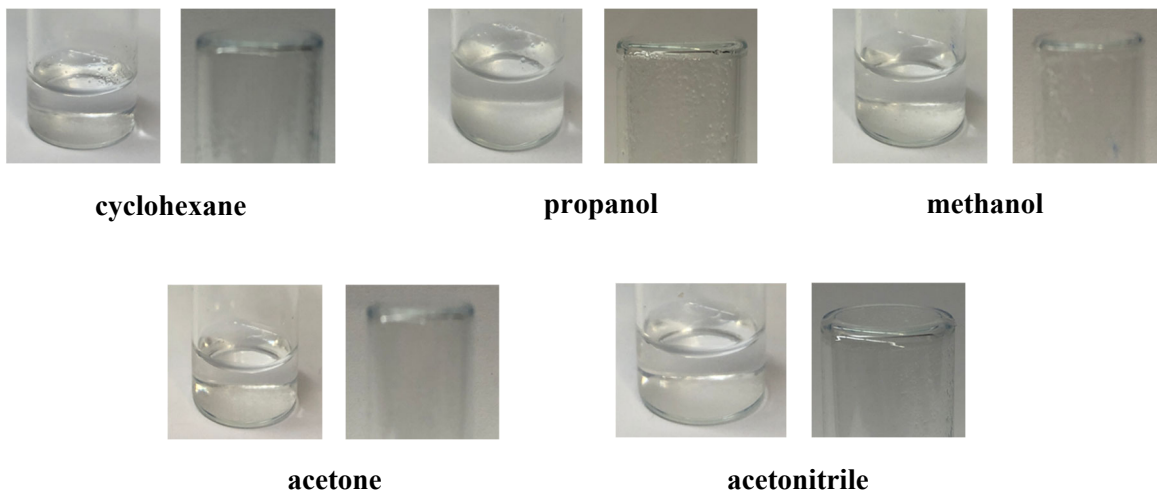

**Figure S2.** Vials and inverted vials of 5% **PVA** and 50 mM **BA** in various organic solvents. From left to right, starting at the top, the solvents are as follows: cyclohexane, propanol, methanol, acetone, and acetonitrile.

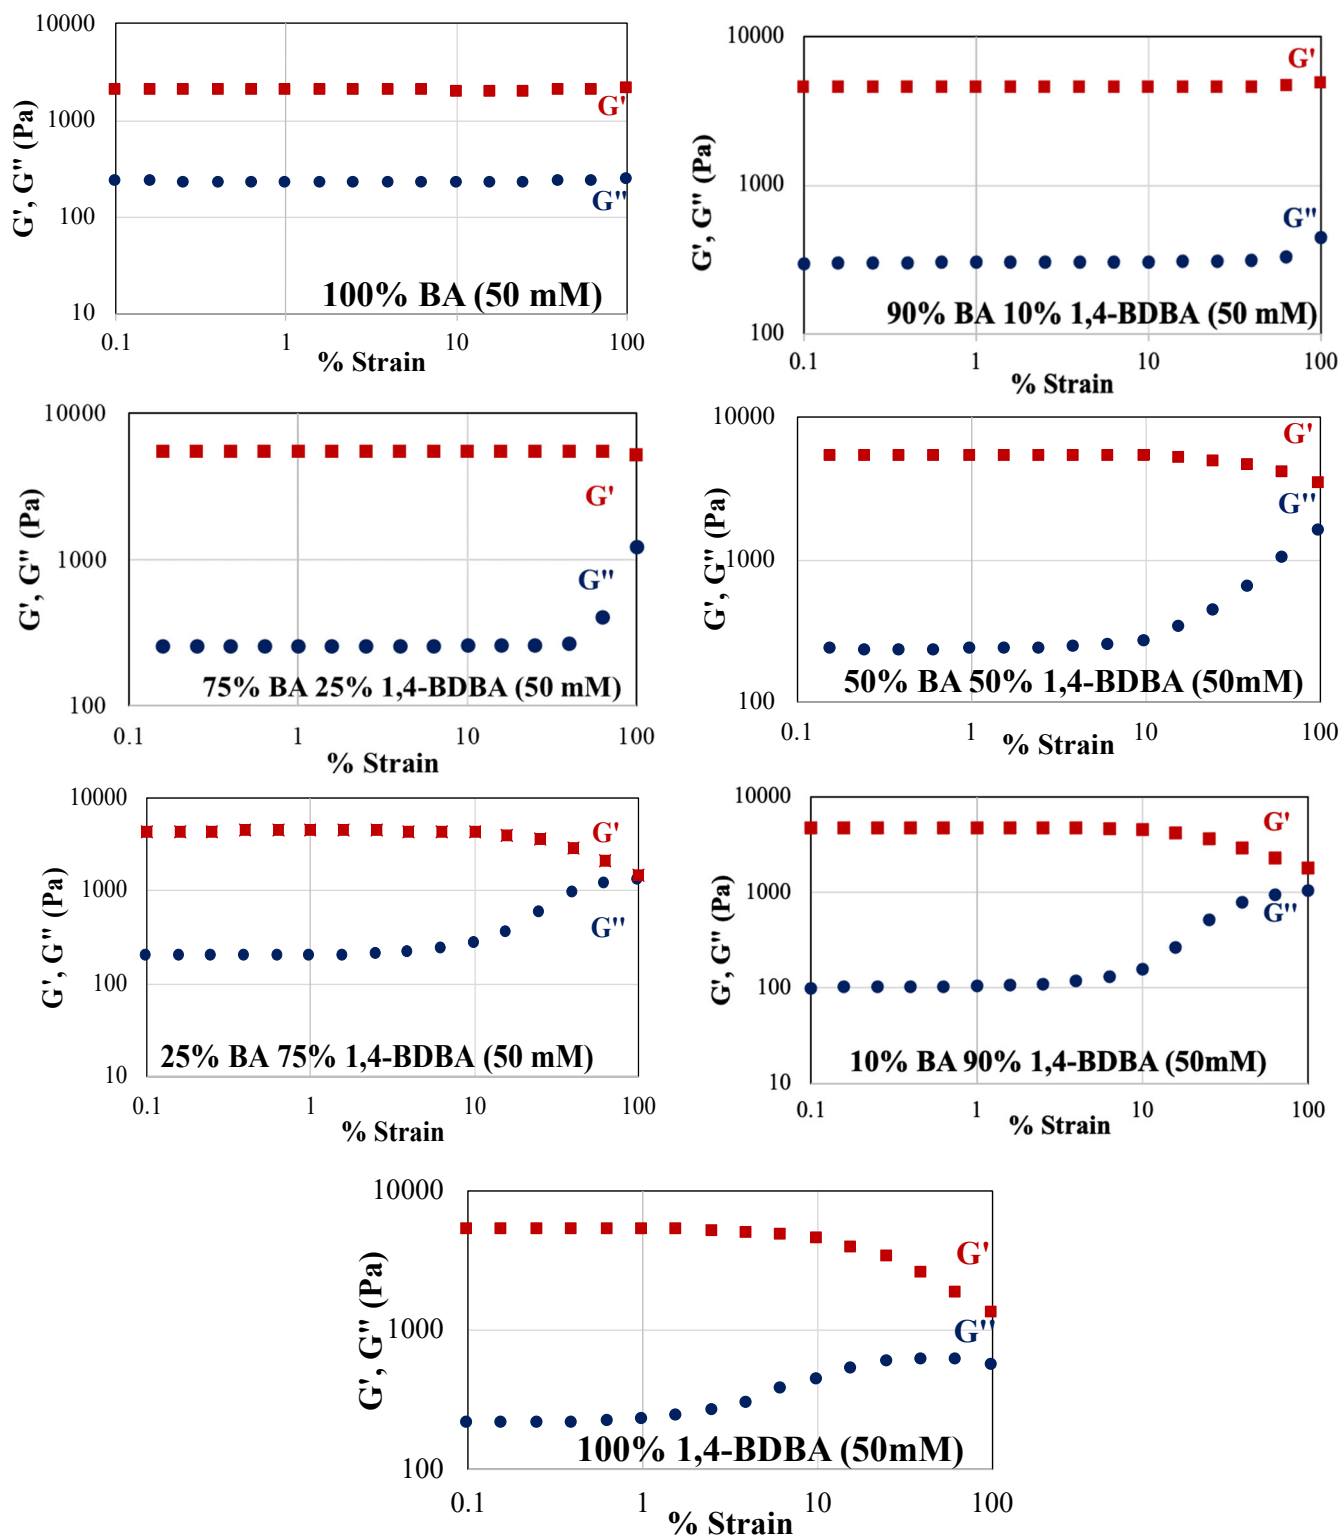

**Figure S3.** Strain sweeps of PVA gels in DMSO at a constant angular frequency of 10 rad/s with 50 mM BA alone, 50 mM 1,4-BDBA alone, and various combinations of BA and 1,4-BDBA at an overall crosslinker concentration of 50 mM.

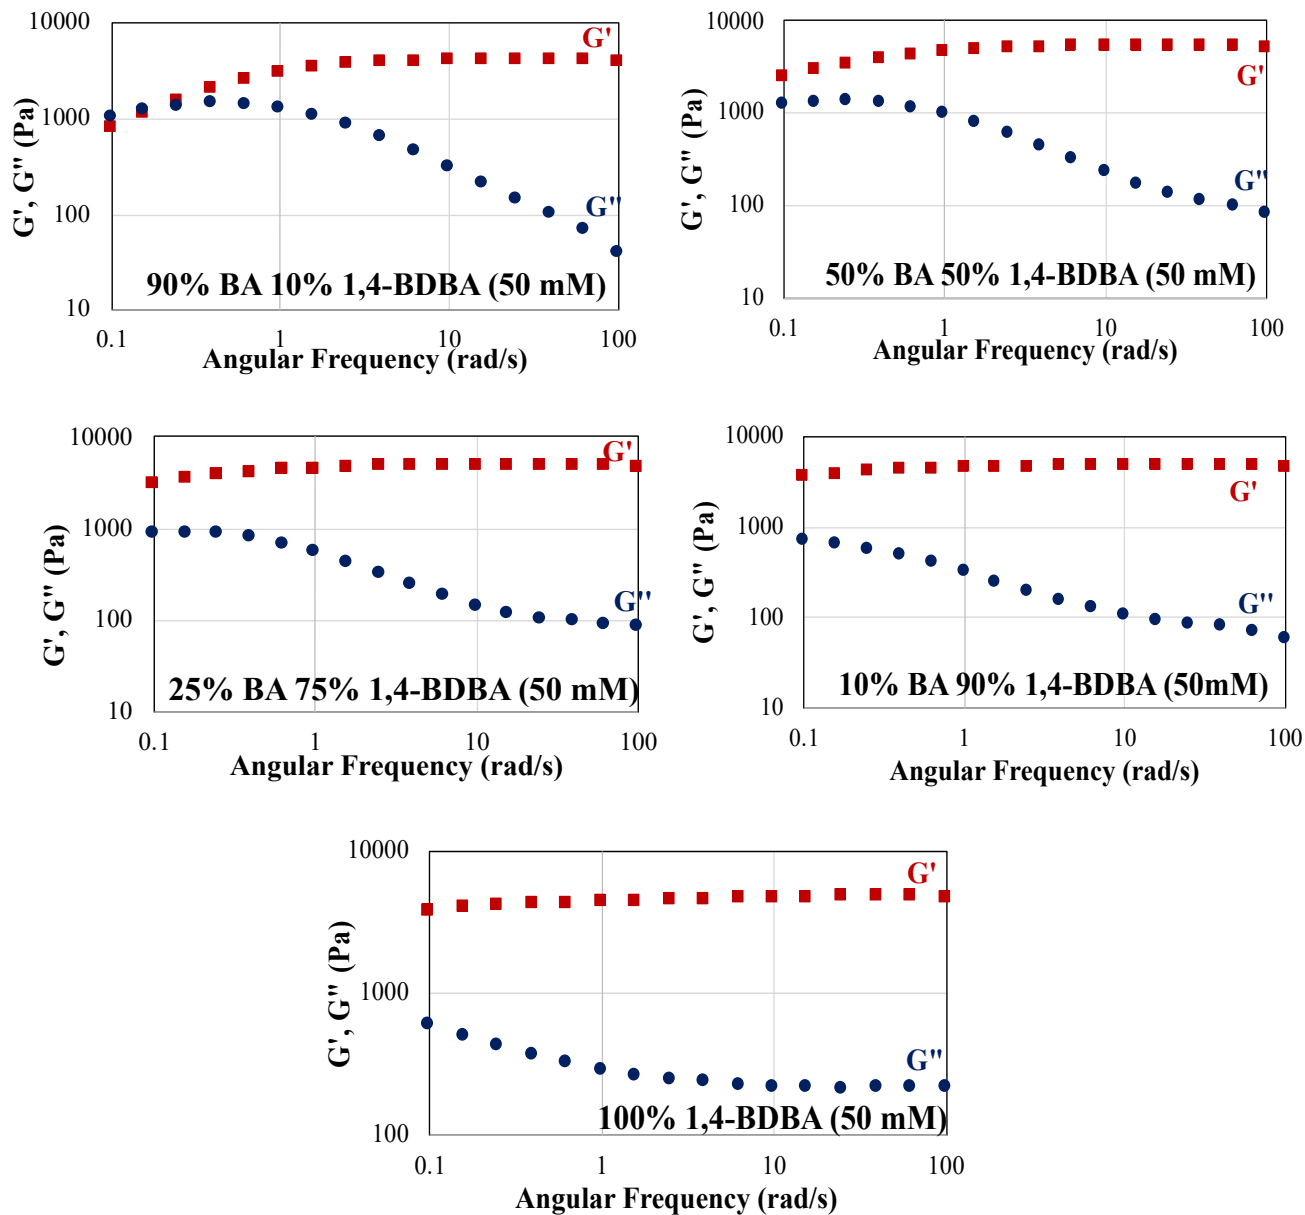

**Figure S4.** Frequency sweeps of PVA gels in DMSO at 1% strain with 50 mM BA alone, 50 mM 1,4-BDBA alone, and various combinations of BA and 1,4-BDBA at an overall crosslinker concentration of 50 mM.

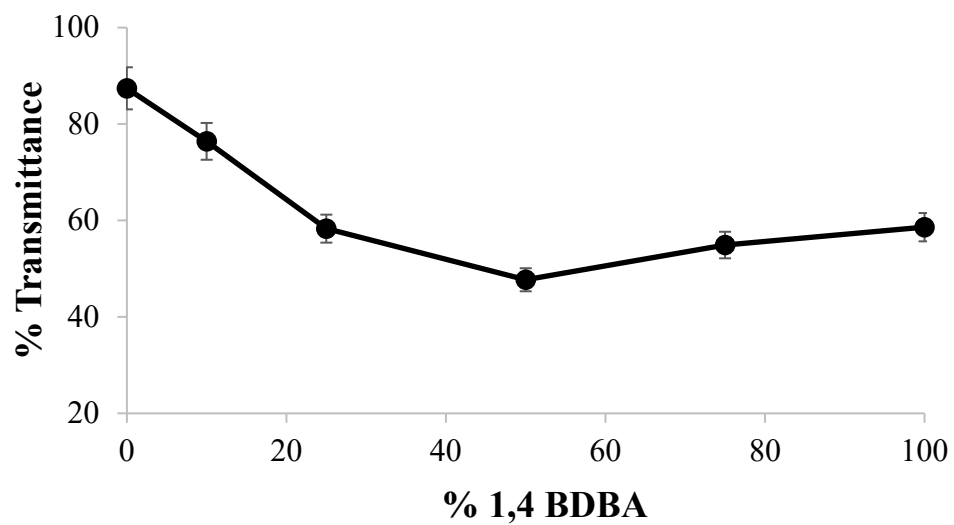

**Figure S5.** %Transmittance at 600 nm for PVA-BA gels (5% in DMSO) as a function of [1,4-BDBA] (overall crosslinker concentration [BA + 1,4-BDBA] = 100 mM).

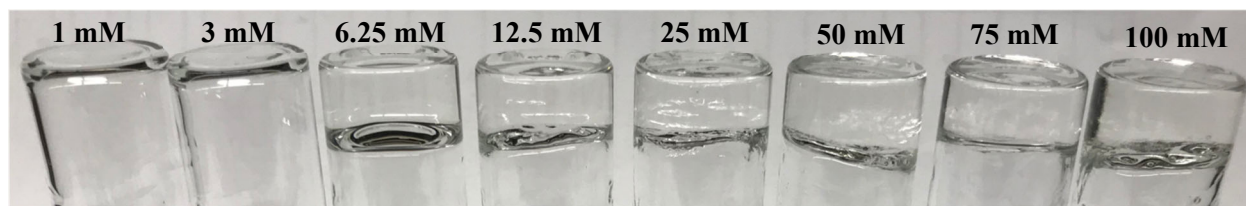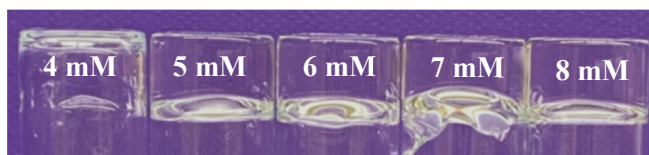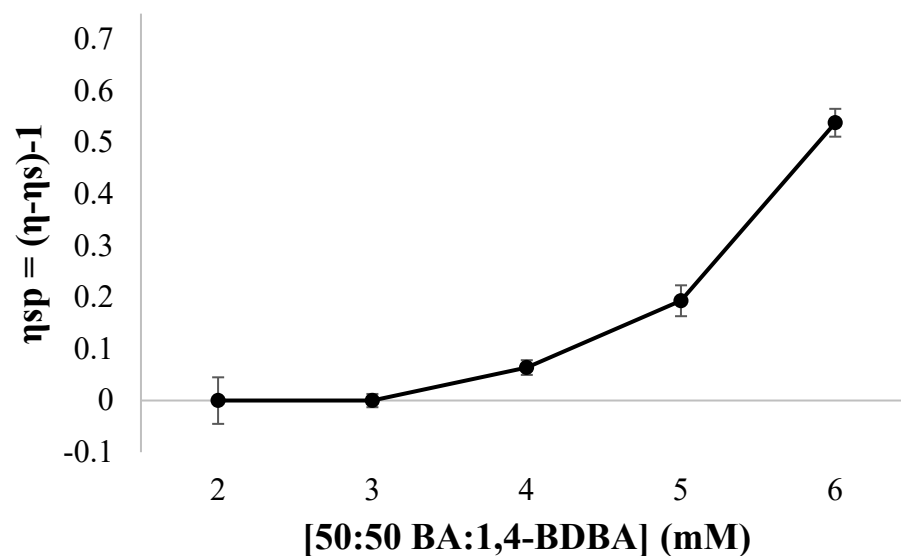

**Figure S6.** Inverted vials of 5% PVA in DMSO with increasing amounts of crosslinkers (50% BA + 50% 1,4-BDBA; top = 1-100 mM; middle = 4-8 mM). Plot of the change in kinematic viscosity of 0.5% PVA in DMSO as a function of [BA:1,4-BDBA] (bottom).

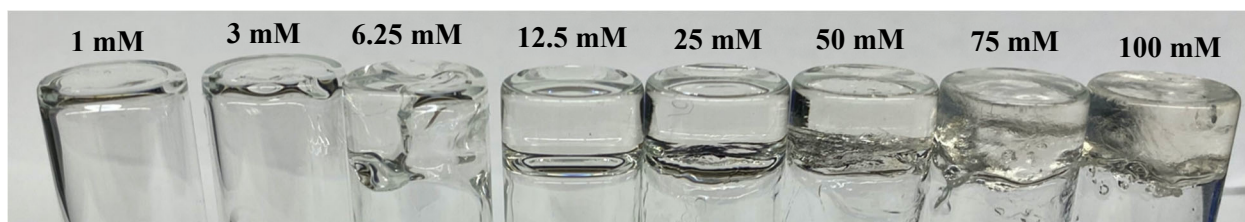

**Figure S7.** Inverted vials of 5% PVA in DMSO with increasing amounts of 1,4-BDBA.

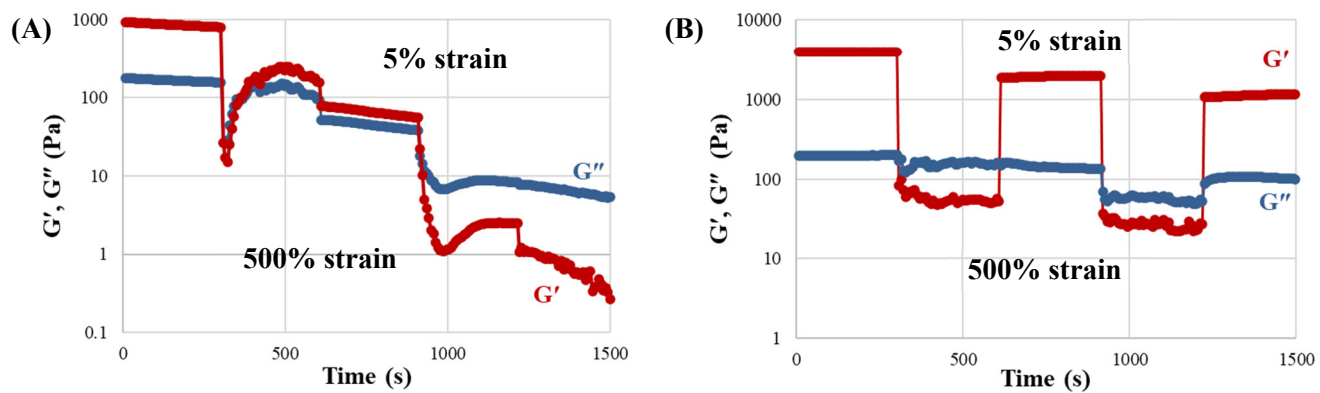

**Figure S8.** Hysteresis loops of PVA gels in DMSO at a constant angular frequency of 10 rad/s with 50 mM BA (A) and 25 mM BA + 25 mM 1,4-BDBA (B).

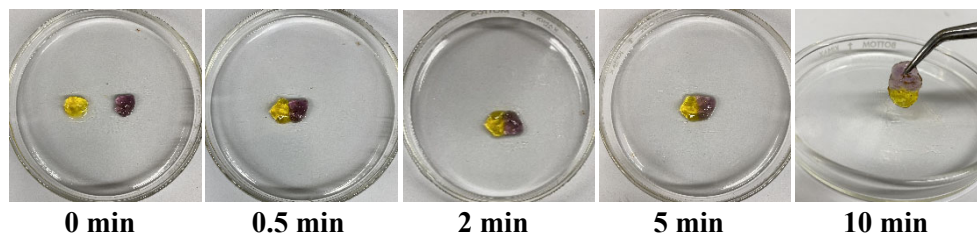

**Figure S9.** Images of PVA gels with 25 mM BA + 25 mM 1,4-BDBA self-healing over time.



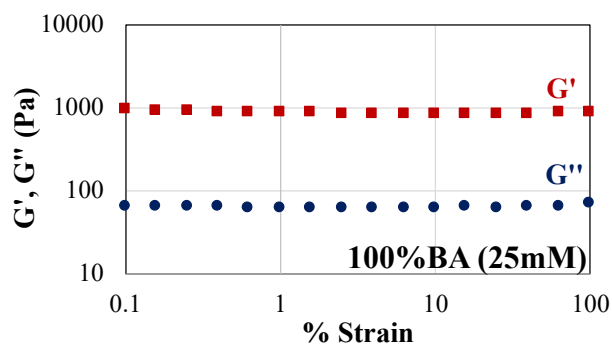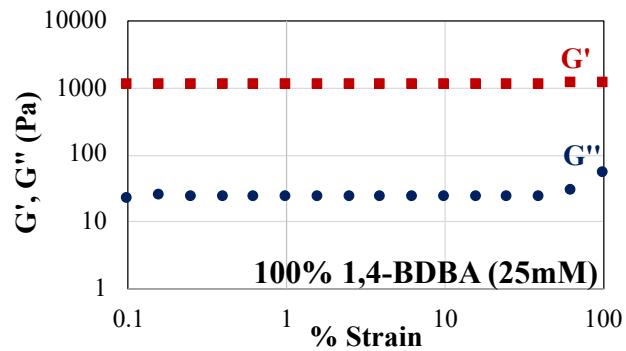

**Figure S10.** Strain sweeps of PVA gels in DMSO at a constant angular frequency of 10 rad/s with 25 mM BA alone and 25 mM 1,4-BDBA alone.

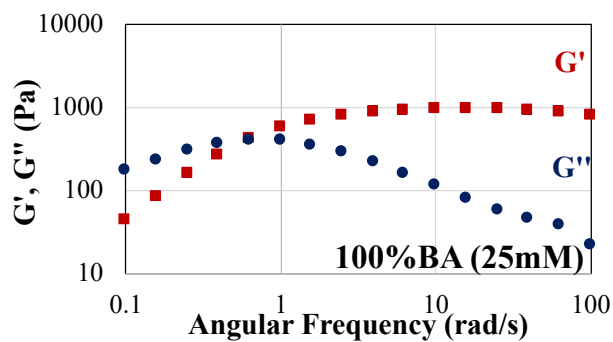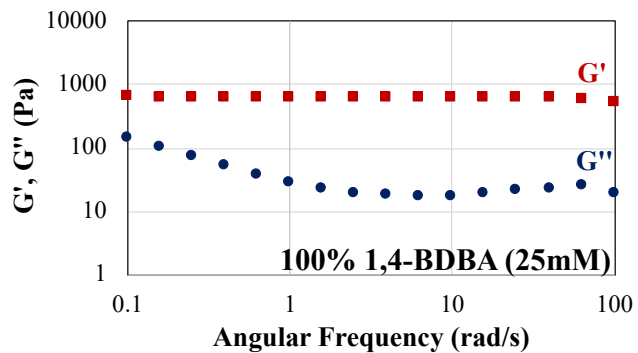

**Figure S11.** Frequency sweeps of PVA gels in DMSO at 1% strain with 25 mM BA alone and 25 mM 1,4-BDBA alone.

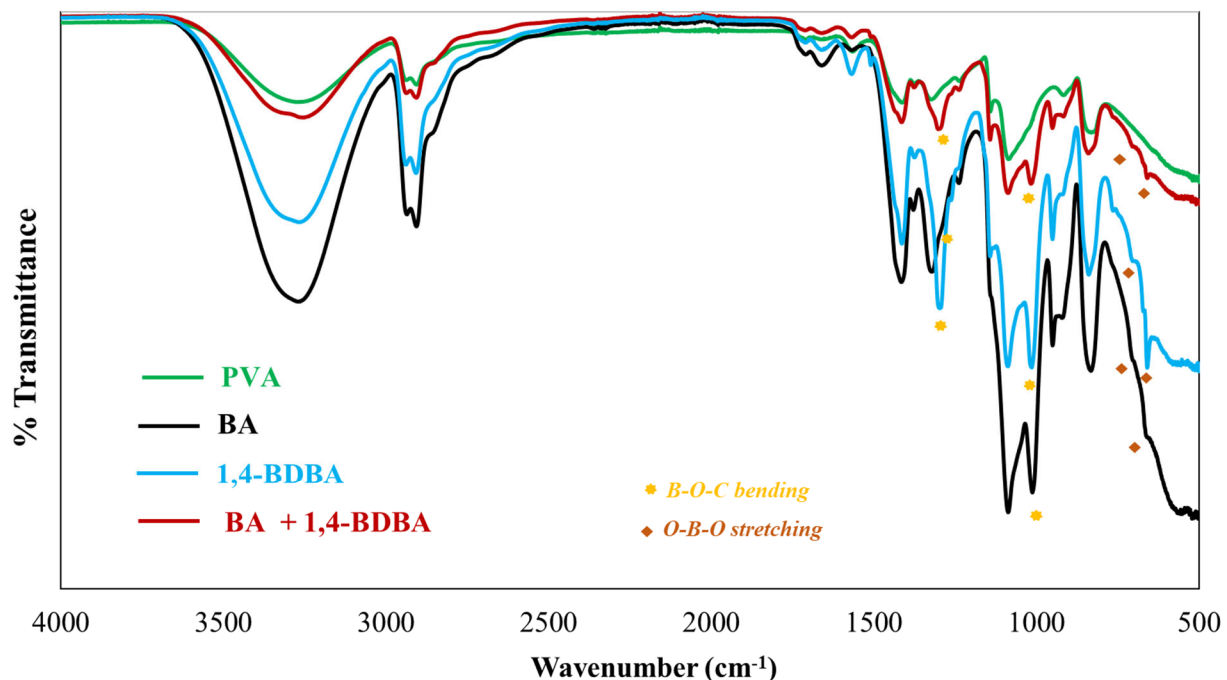

**Figure S12.** Full FTIR spectra of lyophilized PVA ( — PVA ), PVA + BA ( — BA ), PVA + 1,4-BDBA ( — 1,4-BDBA ), and PVA + BA + 1,4-BDBA ( — BA + 1,4-BDBA ). Notable signals for B-O-C bending (★) and O-B-O stretching (◆) are labeled.

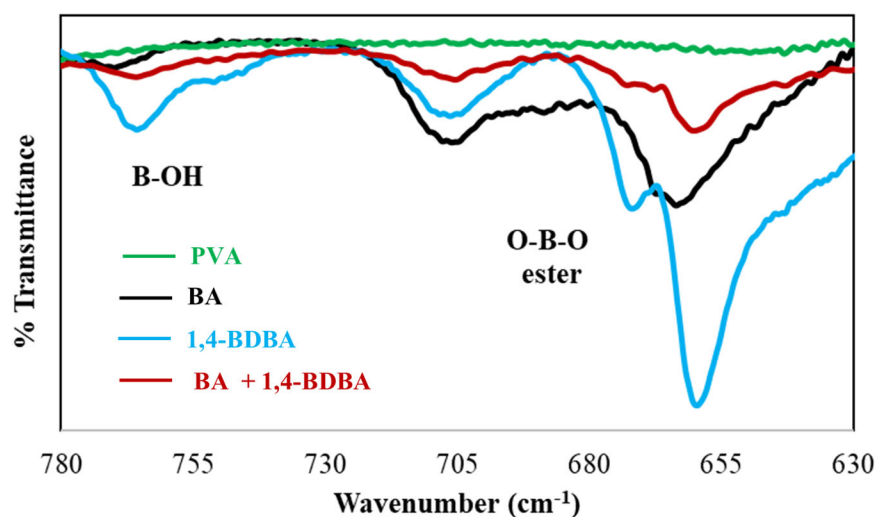

**Figure S13.** Baseline-corrected B-O stretching region of FTIR spectra for lyophilized PVA ( — PVA ), PVA + BA ( — BA ), PVA + 1,4-BDBA ( — 1,4-BDBA ), and PVA + BA + 1,4-BDBA ( — BA + 1,4-BDBA ).

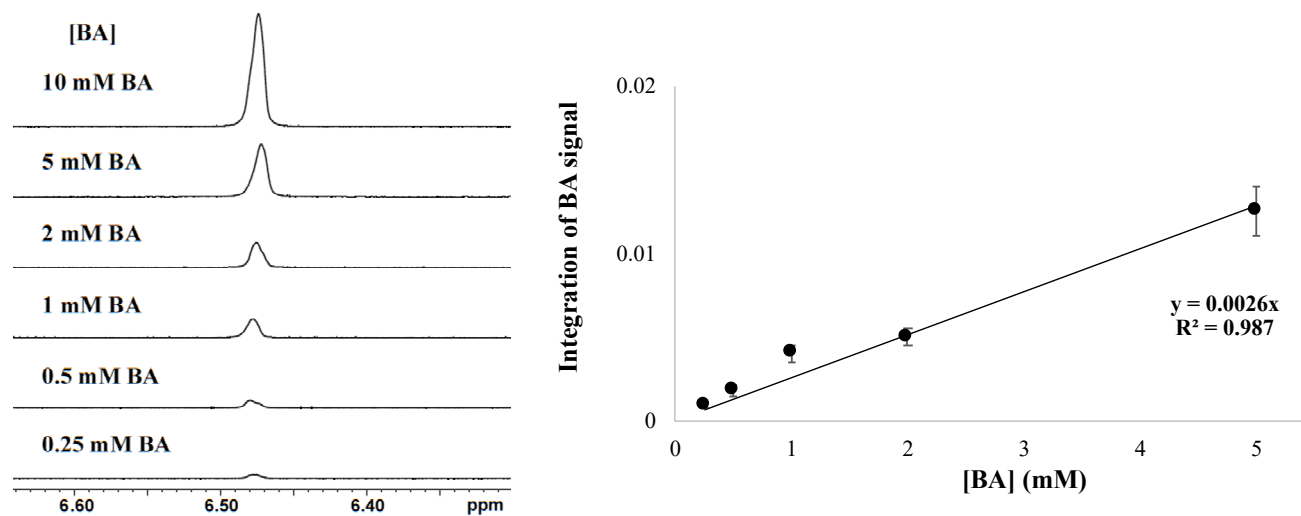

**Figure S14.**  $^1\text{H}$  NMR spectra of **BA** signal at  $\sim 6.48$  ppm for each **BA** standard (from 0.25 mM to 10 mM) and plot of the integration of this signal relative to the  $\text{CH}_2\text{Cl}_2$  internal standard as a function of **BA** concentration.
